# Supplementary material
Source: PubMed Central journal article supplement (PMC3897934)
Supplement: NIHMS541616-supplement-1.pdf [file NIHMS541616-supplement-1.pdf]

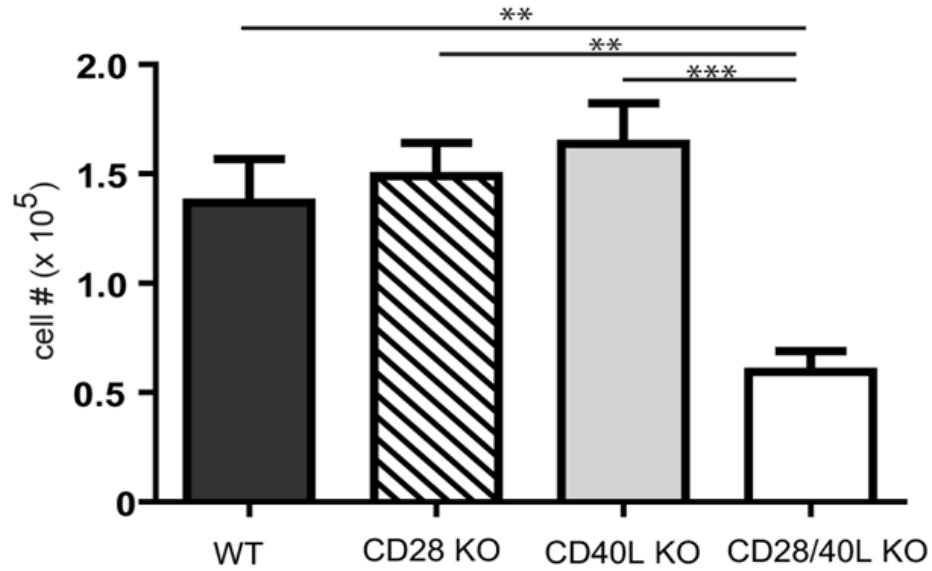

Figure S1. Reduction in mTEC number in CD28/CD40L KO mice. Thymic stromal cells from BALB WT, CD28 KO, CD40L KO and CD28/CD40L KO mice were prepared as described in the Materials and Methods section and stained with anti-CD45, UEA-1, anti-Ly51 and anti-IA/IE. Thymic stromal cells were prepared as in Figure 2. After gating on CD45<sup>neg</sup>, IA/IE<sup>+</sup> cells, numbers of mTEC (UEA<sup>+</sup>) and cTEC (UEA<sup>neg</sup>, Ly51<sup>+</sup>) were calculated for each group. Data shown are averages  $\pm$  SE for  $\geq 7$  mice per group. All mice were between 3-5 weeks of age. (\*\*,  $p \leq 0.01$ ; \*\*\*,  $p \leq 0.001$  \*\*\*\*,  $p \leq 0.0001$ ).

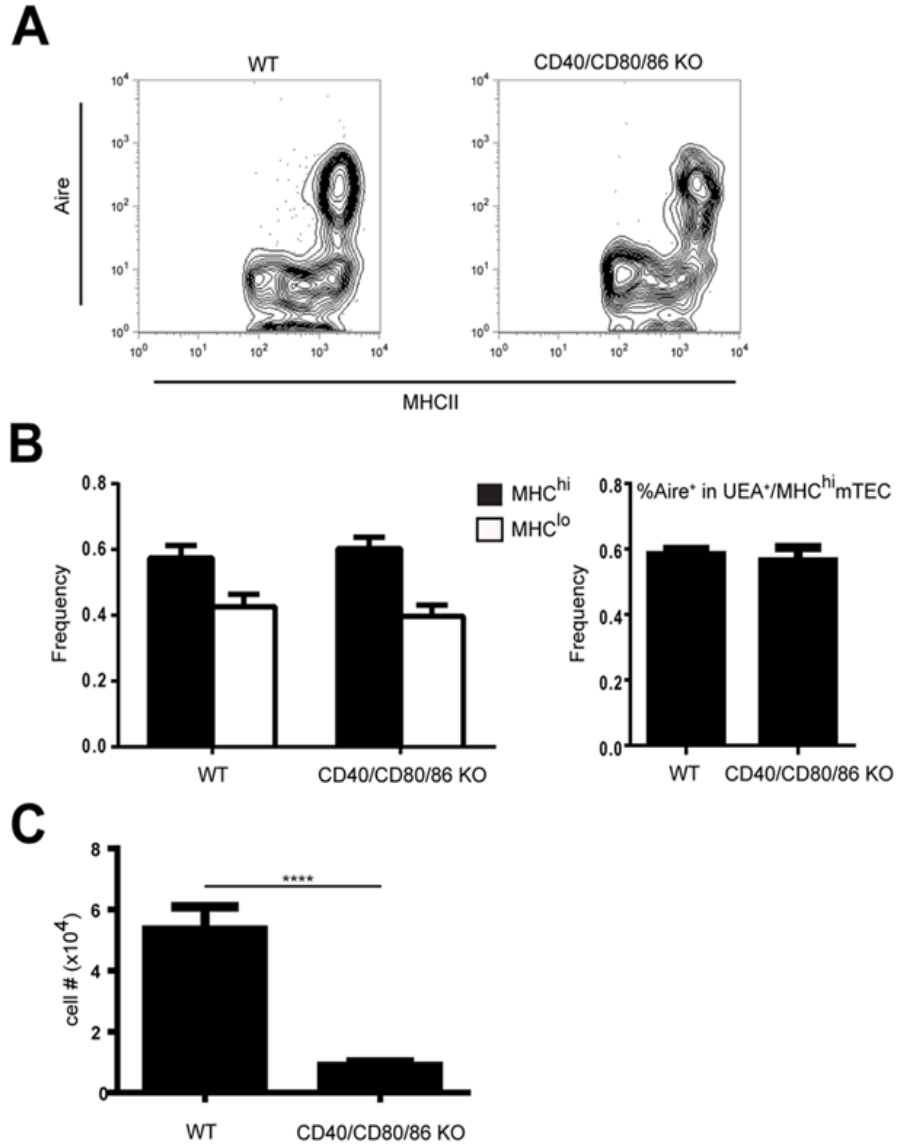

Figure S2. Frequencies of and numbers of AIRE<sup>+</sup>MHC<sup>hi</sup> mTECs in WT and CD40/80/86 KO mice.

Thymic stromal cells from BALB WT and CD40/80/86 KO mice were prepared from 4-5 week old mice and stained with anti-CD45, UEA-1, anti-IA/IE, and anti-AIRE. (A) Representative flow cytometry dot plots are shown after first gating on CD45<sup>neg</sup>, IA/IE<sup>+</sup>, UEA<sup>+</sup> mTECs. (B) Frequencies (shown as mean  $\pm$  SE for n=9 mice) of MHC<sup>hi</sup> and MHC<sup>lo</sup> mTEC, and frequencies of AIRE<sup>+</sup> cells within the MHC<sup>hi</sup> mTECs are shown in the accompanying bar graphs. (C) Total number of AIRE<sup>+</sup> mTECs in WT and CD40/80/86 KO mice. Numbers of AIRE<sup>+</sup> mTECs are the mean  $\pm$  SE for 9-10 mice per strain. (\*\*\*\* p $\leq$  0.0001).

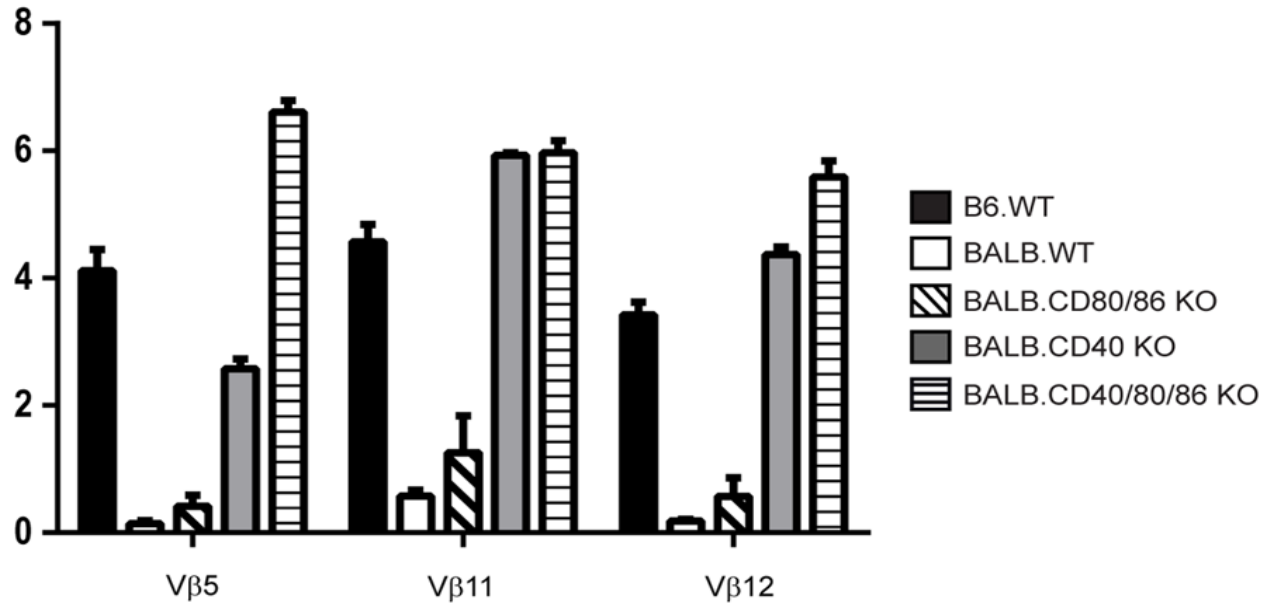

Figure S3. Negative selection is defective in BALB CD40 KO and BALB CD40/80/86 mice.

Thymocytes from 8-12 week old C57BL/6 (n=5), BALB CD80/86 KO (n=5), BALB CD40 WT (n=5) and BALB CD40/80/86 KO (n=3) mice were stained with FITC anti-CD4, PE anti-CD8 and biotin-conjugated anti-TCR Vβ Abs. The percent Vβ positive CD4 SP in each strain is shown.<sup>a</sup>
